# Supplementary material
Source: PubMed Central journal article supplement (PMC6685218)

# Supplementary Figure 1

## A

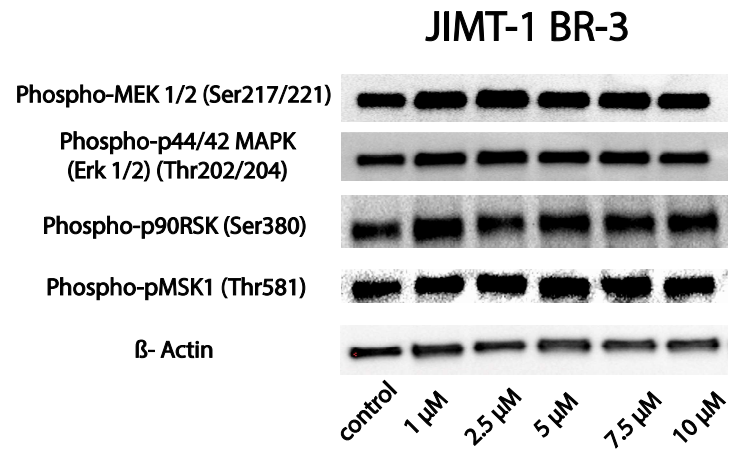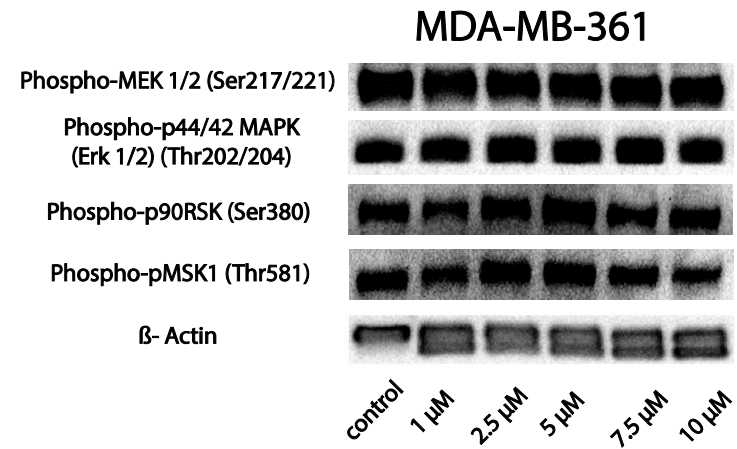

## B

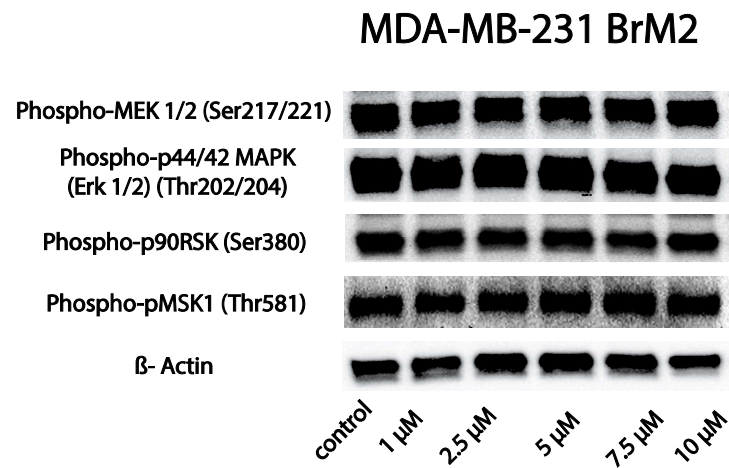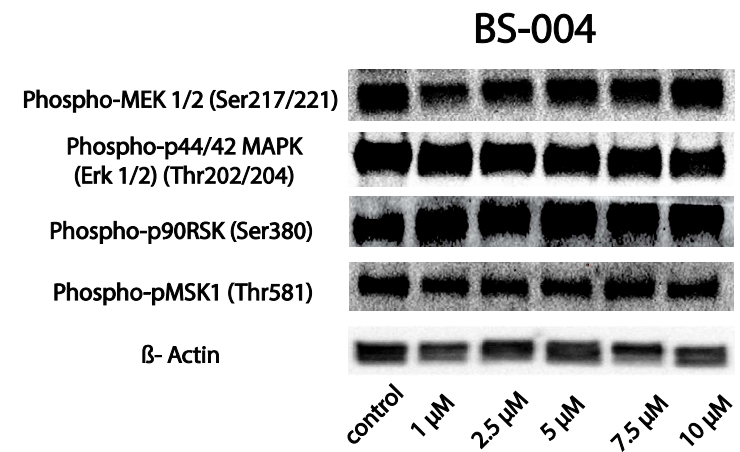

Supplement: NIHMS1522602-supplement-1.pdf [file NIHMS1522602-supplement-1.pdf]

# Supplementary Figure 2

## A

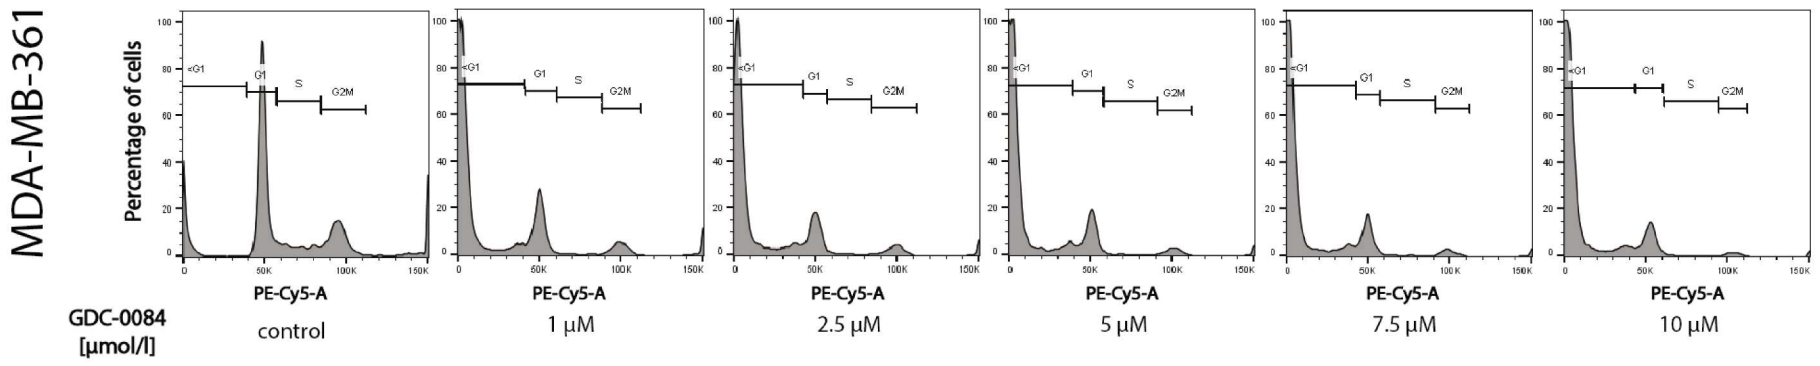

## B

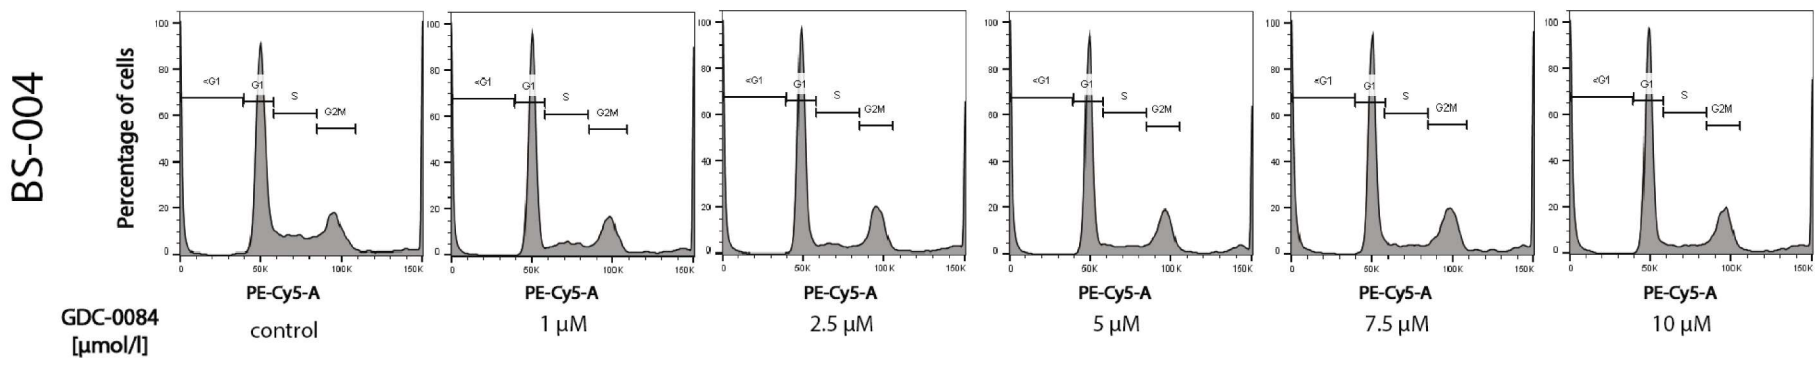

Supplement: NIHMS1522602-supplement-2.pdf [file NIHMS1522602-supplement-2.pdf]

# Supplementary Figure 3

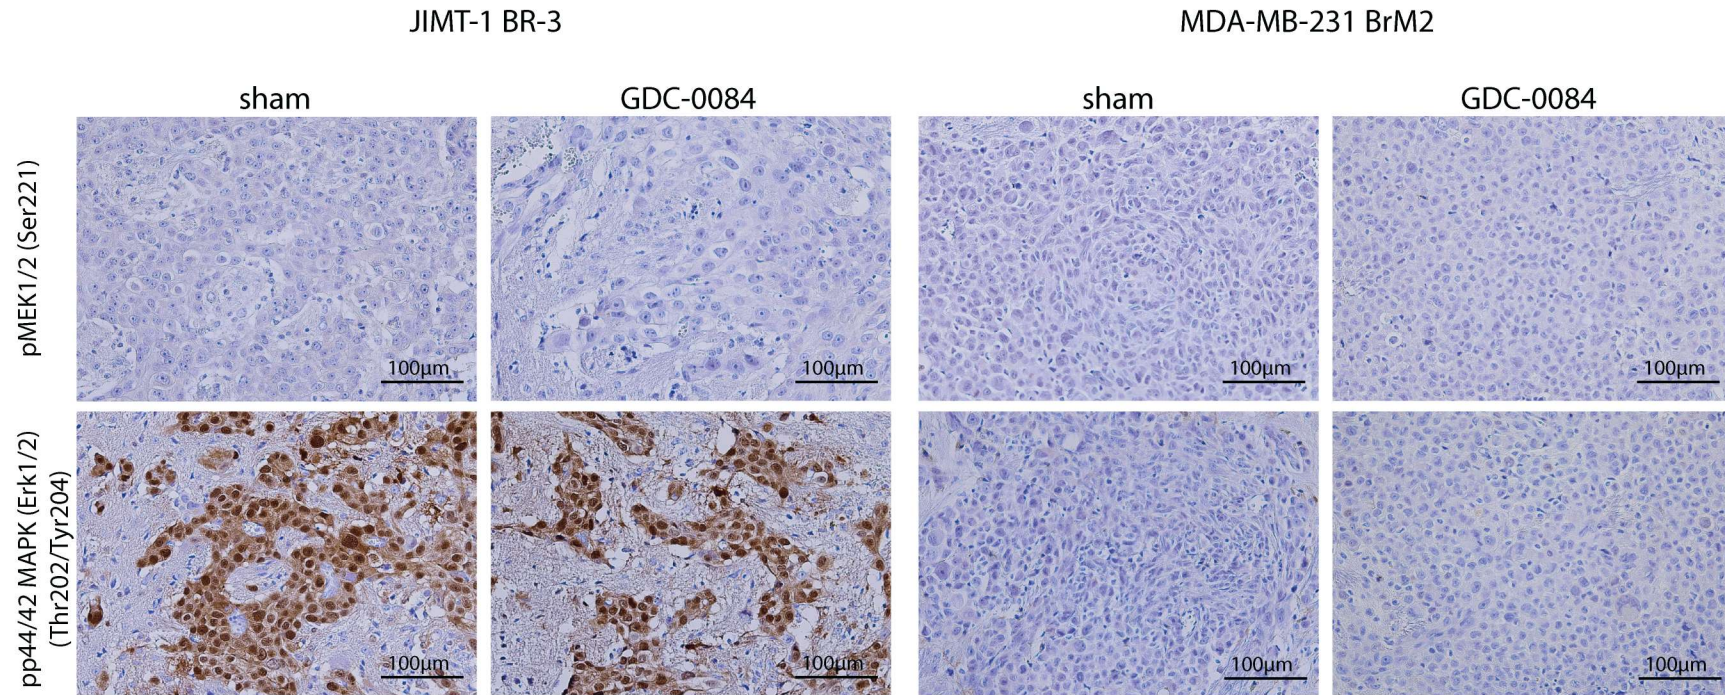

Supplement: NIHMS1522602-supplement-3.pdf [file NIHMS1522602-supplement-3.pdf]
